# Supplementary material
Source: Springer Nature journal article supplement (https://www.springermedizin.de/resource/supplementary/12968_2010_980_MOESM2_ESM.pdf/9580090)

left anterior

septum

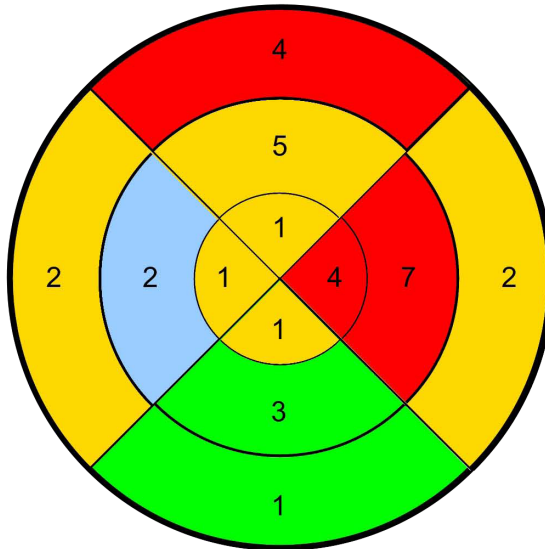

GRE

left inferior

(A)

left lateral

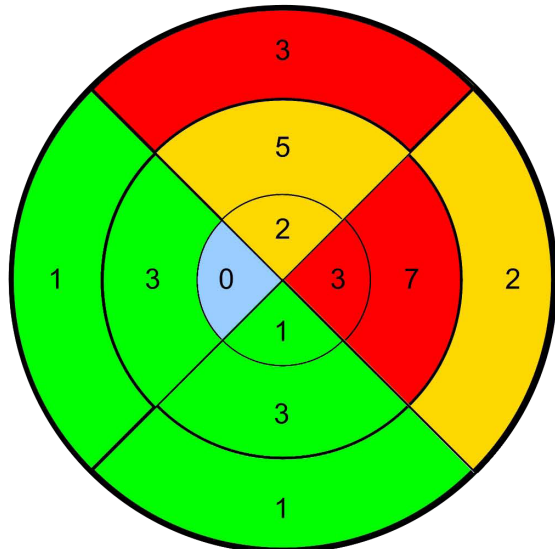

GRE fs

(B)

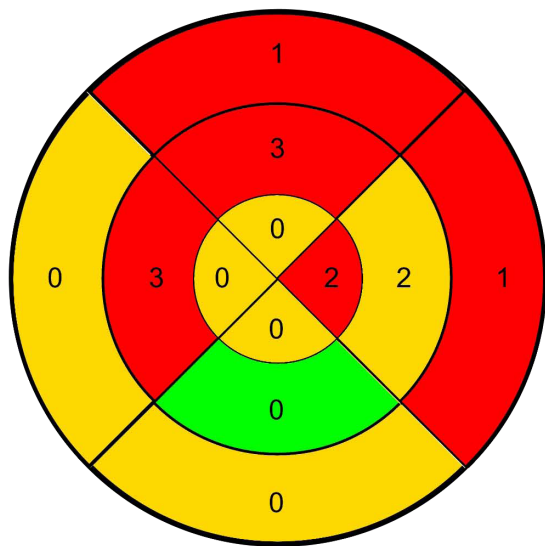

TSE

(C)

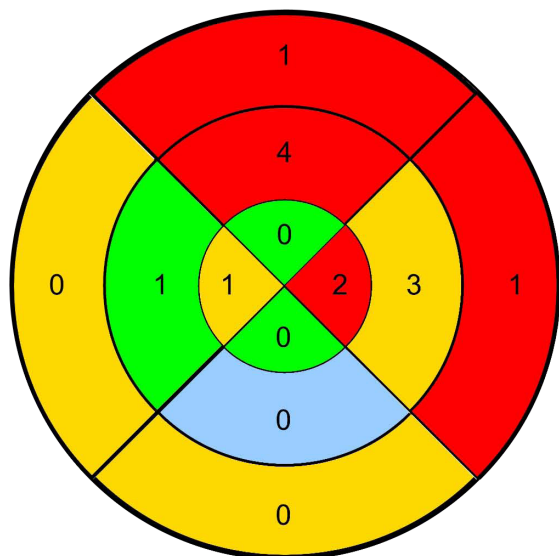

TSE fs

(D)

Supplement: MOESM2 [file 9580090]
